# Supplementary material for: Corrosion comparison of free and roller surfaces of Fe70Si8B12Nb10 amorphous ribbon
Source: Royal Society of Chemistry journal article supplement (doi:10.1039/d1ra05747b), 2021-01-01
Supplement: d1ra05747b1.pdf [file d1ra05747b1.pdf]

Fig. S1 XPS spectra of Fe 2p, Si 2p, B 1s, Nb 3d and O 1s for free-surface and roller-surface of  $\text{Fe}_{70}\text{Si}_8\text{B}_{12}\text{Nb}_{10}$  ribbon with etching time  $t_e$ ; the column shows the peak area of the

| $x$                        | $R_s$<br>( $\Omega \cdot \text{cm}^2$ ) | $Q_{\text{out}}$                                        |                                | $Q_{\text{in}}$                                        |                                |                                              | $Q_a$ |       | $R_a \times 10^4$<br>( $\Omega \cdot \text{cm}^2$ ) | $R_{\text{total}} \times 10^4$<br>( $\Omega \cdot \text{cm}^2$ ) | $X^2$<br>( $\times 10^{-4}$ ) |      |
|----------------------------|-----------------------------------------|---------------------------------------------------------|--------------------------------|--------------------------------------------------------|--------------------------------|----------------------------------------------|-------|-------|-----------------------------------------------------|------------------------------------------------------------------|-------------------------------|------|
|                            |                                         | $Y_{\text{out}}$                                        | $R_{\text{out}}$               | $Y_{\text{in}}$                                        | $R_{\text{in}}$                | $Y_a$                                        |       |       |                                                     |                                                                  |                               |      |
|                            |                                         | $(10^{-7}\Omega \cdot \text{cm}^2)$<br>$n_{\text{out}}$ | ( $\Omega \cdot \text{cm}^2$ ) | $(10^{-5}\Omega \cdot \text{cm}^2)$<br>$n_{\text{in}}$ | ( $\Omega \cdot \text{cm}^2$ ) | $(10^{-5}\Omega \cdot \text{cm}^2)$<br>$n_a$ |       |       |                                                     |                                                                  |                               |      |
| Free-surface               | 1.20                                    | 200.13                                                  | 0.75                           | 7.54                                                   | 663                            | 0.86                                         | 33.24 | 0.80  | 0.94                                                | 88.95                                                            | 88.96                         | 8.63 |
| Rel. Std.error in percents | 5.25                                    | 4.17                                                    | 1.20                           | 35.40                                                  | 13.76                          | 20.65                                        | 10.81 | 42.14 | 5.87                                                | 35.95                                                            |                               |      |
| Roller-surface             | 0.33                                    | 10.26                                                   | 1.00                           | 0.01                                                   | 10.78                          | 0.75                                         | 43.68 | 4.69  | 0.85                                                | 1.03                                                             | 1.04                          | 6.64 |
| Rel. Std.error in percents | 10.30                                   | 49.42                                                   | 38.89                          | 25.49                                                  | 10.20                          | 5.362                                        | 24.5  | 11.84 | 2.01                                                | 46.35                                                            |                               |      |

corresponding oxides and elementary substance.

Table S1. Fitting results of EIS and corresponding errors.
